# Supplementary material for: Influence of redox engineering on the trade-off relationship between thermopower and electrical conductivity in lanthanum titanium based transition metal oxides
Source: Royal Society of Chemistry journal article supplement (doi:10.1039/d4ma00829d), 2024-01-01
Supplement: d4ma00829d1.pdf [file d4ma00829d1.pdf]

## Supporting Information

### **Influence of redox engineering on the trade-off relationship between thermopower and electrical conductivity in lanthanum titanium based transition metal oxides**

Mohammad El Loubani<sup>a</sup>, Gene Yang<sup>a</sup>, Seyed Morteza Taghavi Kouzehkanan<sup>b</sup>, Tae-Sik Oh<sup>b</sup>, Santosh Kiran Balijepalli<sup>c</sup> and Dongkyu Lee<sup>a,\*</sup>

<sup>a</sup>Department of Mechanical Engineering, University of South Carolina, Columbia, SC 29208, USA

<sup>b</sup>Department of Chemical Engineering, Auburn University, Auburn, AL 36849, USA

<sup>c</sup>Office of the Vice President for Research, University of South Carolina, Columbia, SC 29208, USA

\* Author to whom correspondence should be addressed: [dongkyu@cec.sc.edu](mailto:dongkyu@cec.sc.edu)

### Weighted carrier properties calculation

The weighted mobility ( $\mu_w$ ) is a measure of the electron mobility weighted by the density of electronic states.<sup>1</sup> The weighted mobility, like the hall mobility, can be defined as a simple function of two measured properties,  $S$  and  $\sigma$ .<sup>1</sup> The following equation is a simple analytic form for  $\mu_w$ :<sup>1</sup>

$$\mu_w = \frac{3h^3\sigma}{8\pi e(2m_e k_B T)^{3/2}} \left[ \frac{\exp\left(\frac{|S|}{k_B/e} - 2\right)}{1 + \exp\left(-5\left(\frac{|S|}{k_B/e} - 1\right)\right)} + \frac{\frac{3}{\pi^2} \frac{|S|}{k_B/e}}{1 + \exp\left(5\left(\frac{|S|}{k_B/e} - 1\right)\right)} \right]$$

Where  $h$  is Planck's constant (eV · s),  $\sigma$  is the electrical conductivity (S/cm),  $e$  is the electron charge (eV),  $k_B$  the Boltzmann constant (eV/K),  $T$  is the operating temperature, and  $S$  is the thermopower ( $\mu$ V/K).

The weighted carrier properties can be obtained using the calculated  $\mu_w$ . The weighted carrier concentration ( $n_w$ ) was calculated using the formula below:<sup>2</sup>

$$n_w = \frac{\sigma}{\mu_w e}$$

The relaxation time ( $\tau_w$ ) was obtained by using the following equation:<sup>3</sup>

$$\tau_w = \frac{m_w^* \mu_w}{e}$$

Where  $m_w^*$  is the weighted effective mass which was calculated by using the following equation:<sup>4</sup>

$$\frac{m_w^*}{m_e} = \frac{3eh^2 \times S}{8\pi^2 k_B^2 \times T \times (\pi/3n_w)^{2/3}}$$

Where  $m_e$  is the mass of an electron.

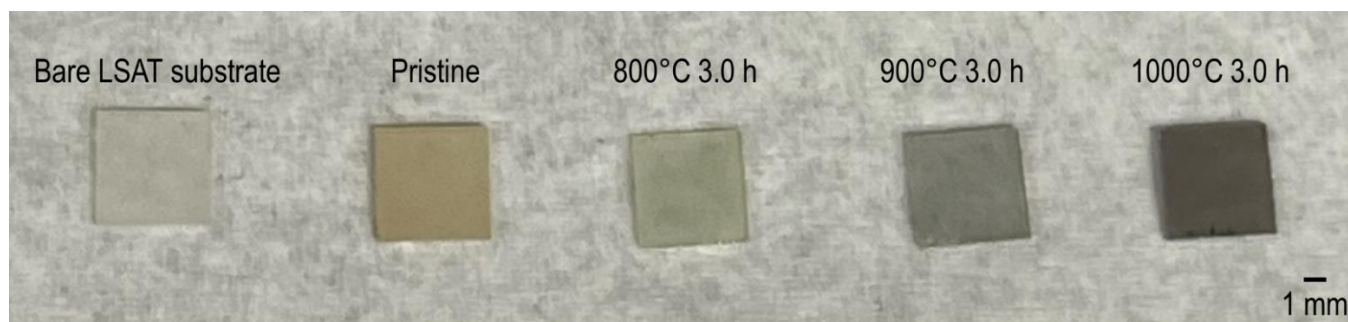

**Fig. S1:** Picture of the bare LSAT substrate and LCNTO thin films grown on LSAT substrates exposed to different reduction conditions.

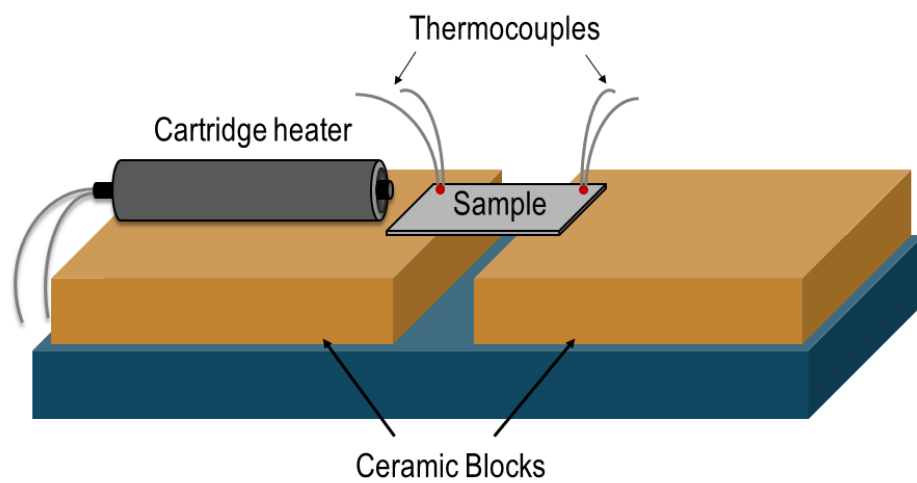

**Fig. S2:** Schematic of the measurement setup that was used to measure  $S$ .

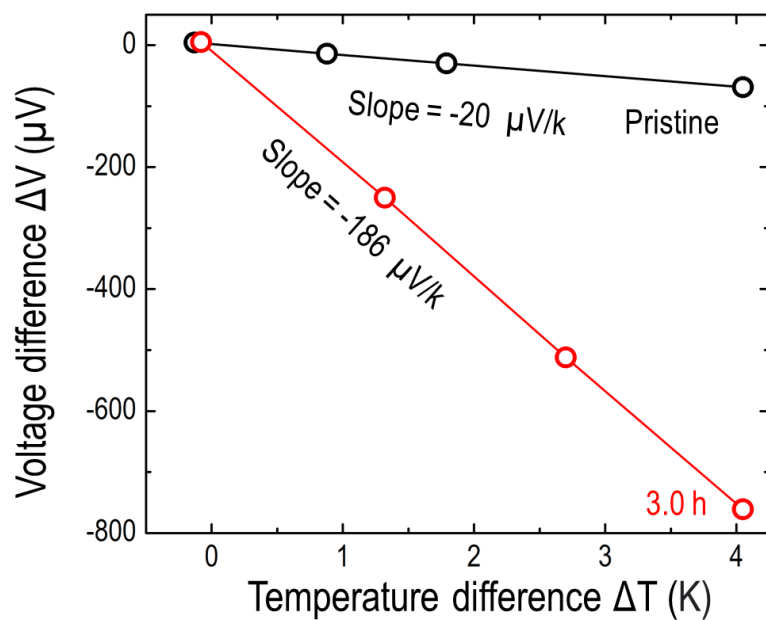

**Fig. S3:** Voltage difference ( $\Delta V$ ) as a function of Temperature difference ( $\Delta T$ ) measured at room temperature with the pristine and reduced LCNTO films at  $900^\circ\text{C}$  for 3.0 h.  $S$  was extracted from the different slopes ( $\Delta V/\Delta T$ ) of both samples.

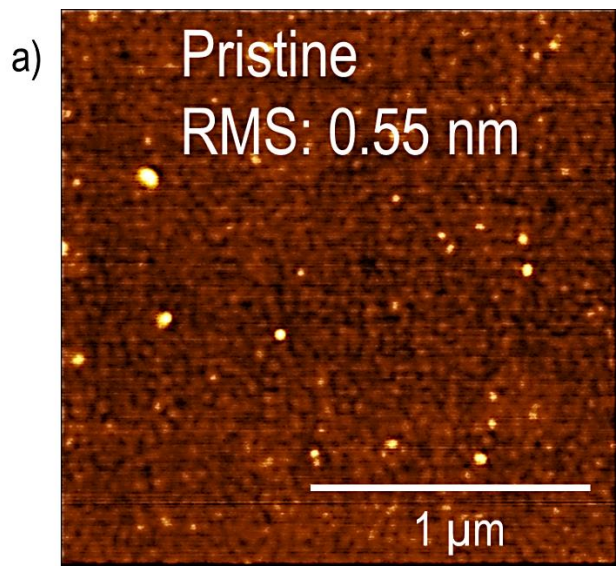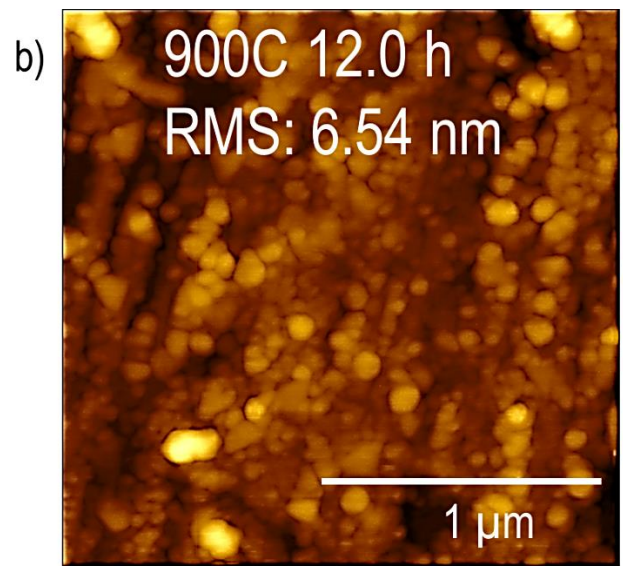

**Fig. S4:** AFM images of the (a) pristine LCNTO film and (b) LCNTO film reduced at 900°C for 12.0 h.

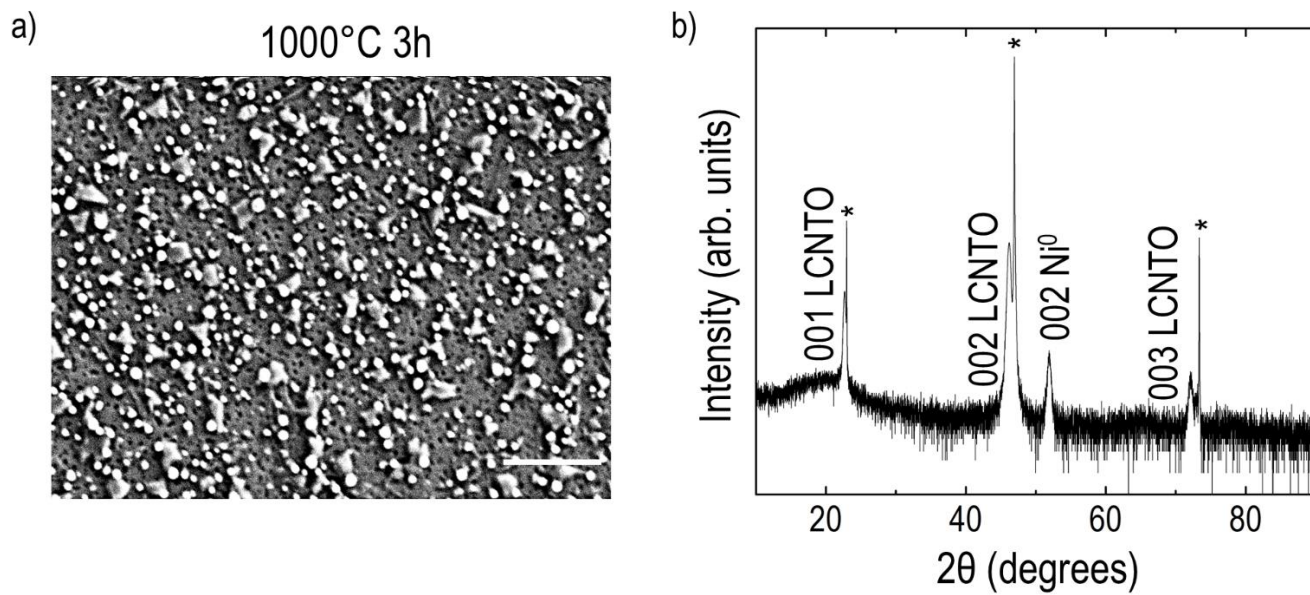

**Fig. S5:** (a) SEM images of the surface of LCNTO thin films reduced under 1000 °C for 3.0 h (scale bar: 1 μm). (b) XRD  $\theta$ - $2\theta$  patterns of the reduced LCNTO thin films at 1000°C for 3.0 h (Substrate peaks are indicated with \*).

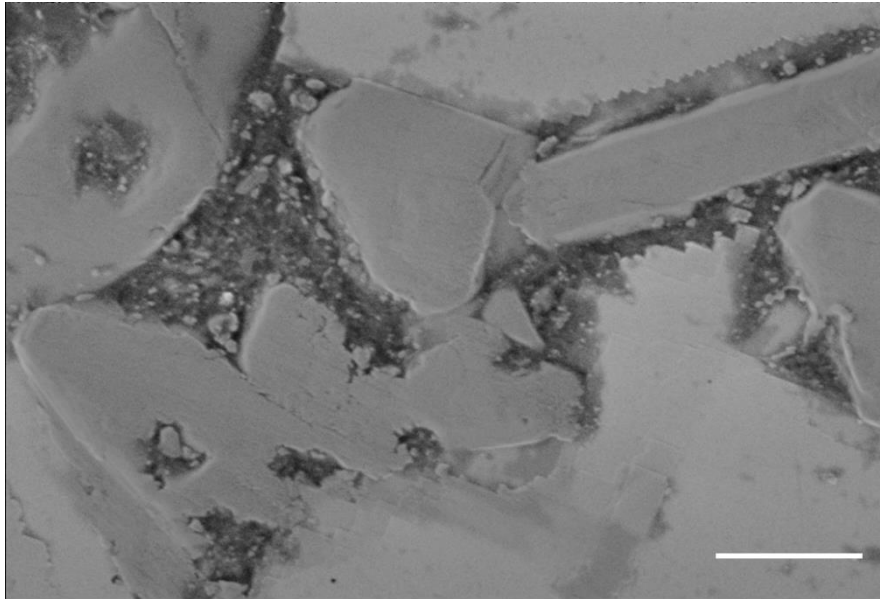

**Fig. S6:** SEM image of the surface of LCNTO thin films post-annealed in air under 1200 °C for 12.0 h (scale bar: 1  $\mu\text{m}$ ).



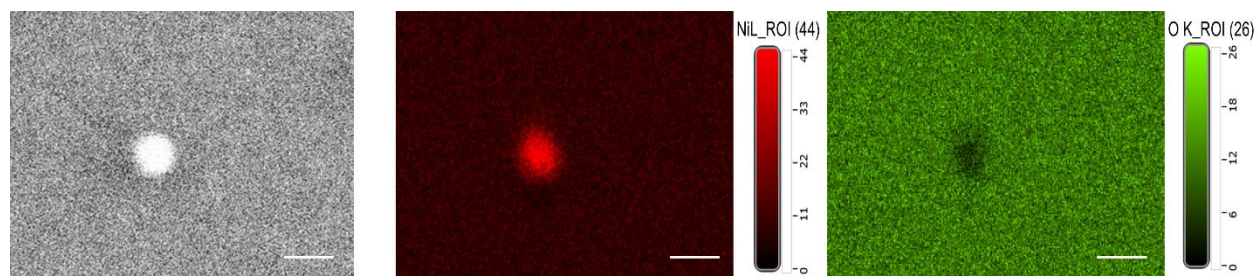

**Fig. S7.** Top view SEM image of LCNTO film reduced at 900°C for 3.0 h and its corresponding Nickel and Oxygen EDX map (scale bar: 100 nm).

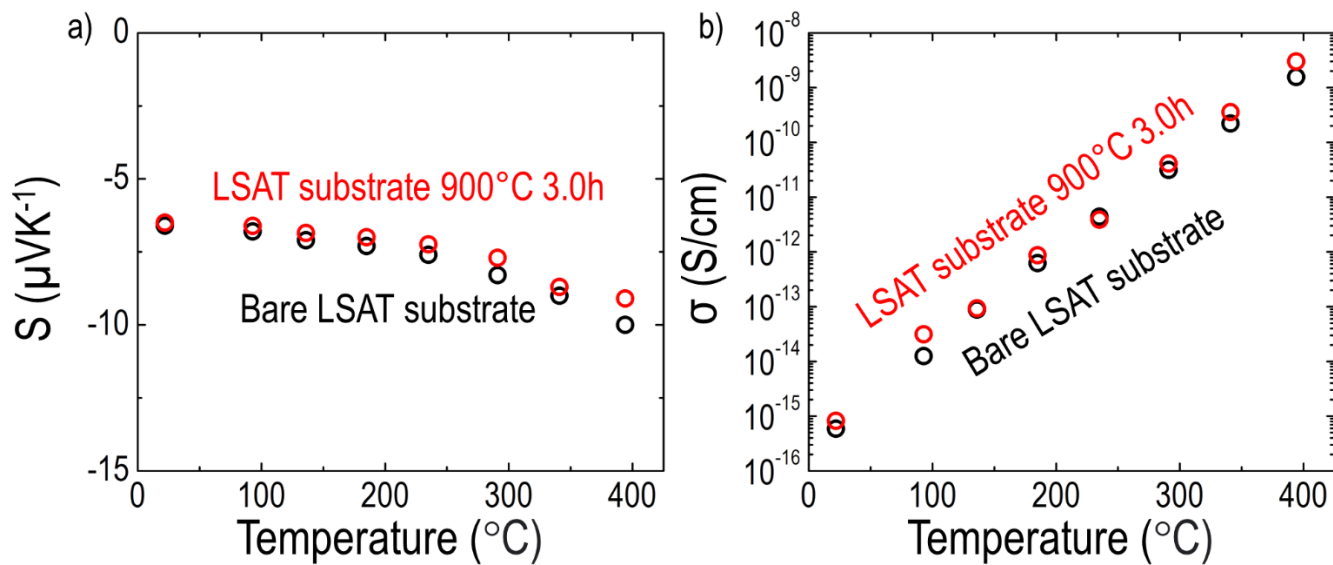

**Fig. S8:** Temperature dependencies of (a)  $S$  and (b)  $\sigma$  of the pristine LSAT substrate (black) and reduced LSAT substrate at 900°C for 3.0 h (red) measured from 20 to 400°C.

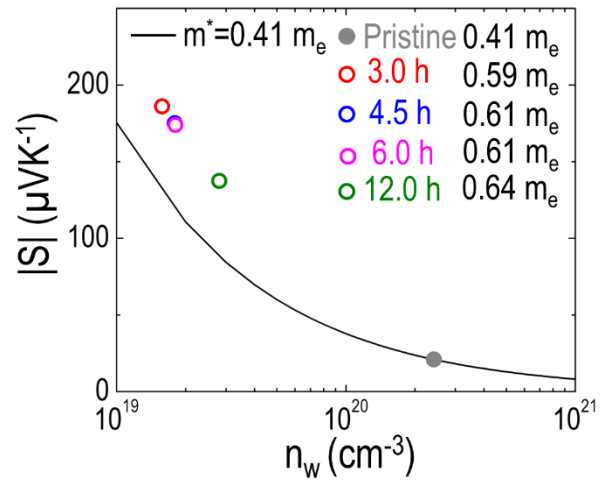

**Fig. S9.** Pisarenko relation (variation of  $|S|$  with  $n_w$ ) for the LCNTO thin films before and after reduction at 900 °C with varying reduction time at room temperature.

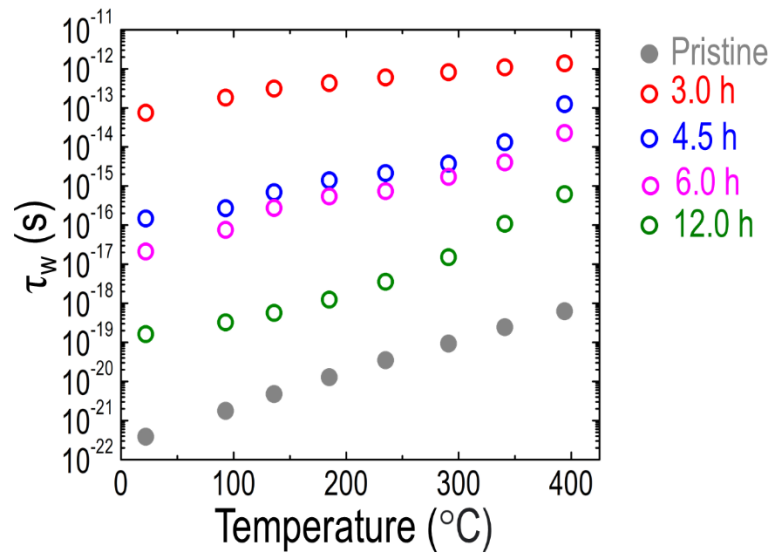

**Fig. S10:** Temperature dependencies of  $\tau_w$  of the pristine and reduced LCNTO thin films at 900 °C with varying reduction time.

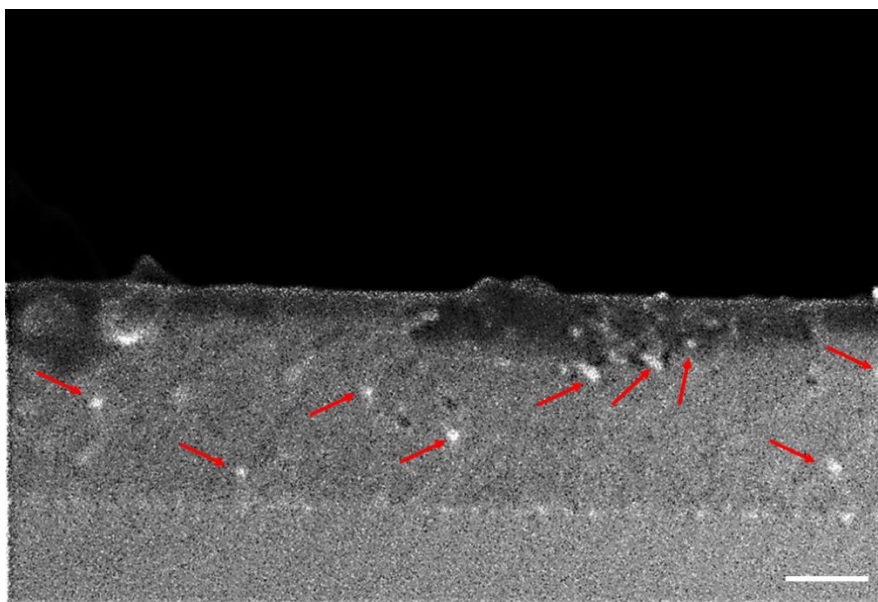

**Fig. S11.** Cross-sectional SEM image of LCNTO film reduced at 900°C for 12.0 h. The red arrows indicate Ni particles (scale bar: 100 nm).

## References

1. G. J. Snyder, A. H. Snyder, M. Wood, R. Gurunathan, B. H. Snyder and C. Niu, *Advanced Materials*, 2020, **32**, 2001537.
2. T. Katase, X. He, T. Tadano, J. M. Tomczak, T. Onozato, K. Ide, B. Feng, T. Tohei, H. Hiramatsu and H. Ohta, *Advanced Science*, 2021, **8**, 2102097.
3. M. Massetti, F. Jiao, A. J. Ferguson, D. Zhao, K. Wijeratne, A. Würger, J. L. Blackburn, X. Crispin and S. Fabiano, *Chemical Reviews*, 2021, **121**, 12465-12547.
4. X. Zhang and L.-D. Zhao, *Journal of Materiomics*, 2015, **1**, 92-105.
